# Supplementary material for: Sequential adaptive introgression of the mitochondrial genome in Drosophila yakuba and Drosophila santomea
Source: PubMed Central journal article supplement — Mol Ecol. 2014 Feb 26;23(5):1124–36. doi: 10.1111/mec.12678 (PMC4260671; doi:10.1111/mec.12678), 2014-02-26
Supplement: mec0023-1124-sd1.pdf [file mec0023-1124-sd1.pdf]

Table S1. Detailed description of the lines used in this study

| Species          | Line   | Location                        | Elevation(m) | Status <sup>a</sup> | Sequencing <sup>b</sup> | Position in the tree <sup>c</sup> |
|------------------|--------|---------------------------------|--------------|---------------------|-------------------------|-----------------------------------|
| <i>D. yakuba</i> | 12 Y   | Abdjan,<br>Ivory Coast          | -            | no-HZ               | ABI                     | no-HZC                            |
| <i>D. yakuba</i> | 21 Y   | Abdjan,<br>Ivory Coast          | -            | no-HZ               | ABI                     | no-HZC                            |
| <i>D. yakuba</i> | 42 Y   | Abdjan,<br>Ivory Coast          | -            | no-HZ               | ABI                     | no-HZC                            |
| <i>D. yakuba</i> | ST     | Tai forest,<br>Ivory Coast      | -            | no-HZ               | ABI                     | no-HZC                            |
| <i>D. yakuba</i> | CAM    | Kounden<br>Plateau,<br>Cameroon | -            | no-HZ               | ABI                     | no-HZC                            |
| <i>D. yakuba</i> | GN46   | Gabon                           | -            | no-HZ               | ABI                     | no-HZC                            |
| <i>D. yakuba</i> | GN110  | Gabon                           | -            | no-HZ               | ABI                     | HZC                               |
| <i>D. yakuba</i> | ZW002A | Zimbabwe                        | -            | no-HZ               | ABI                     | no-HZC                            |
| <i>D. yakuba</i> | ZW121  | Zimbabwe                        | -            | no-HZ               | ABI                     | no-HZC                            |
| <i>D. yakuba</i> | ZW162  | Zimbabwe                        | -            | no-HZ               | ABI                     | no-HZC                            |
| <i>D. yakuba</i> | Ky221  | Kenya                           | -            | no-HZ               | ABI                     | no-HZC                            |
| <i>D. yakuba</i> | TZ032  | Tanzania                        | -            | no-HZ               | ABI                     | HZC                               |
| <i>D. yakuba</i> | TZ025  | Tanzania                        | -            | no-HZ               | ABI                     | no-HZC                            |
| <i>D. yakuba</i> | LP6    | São Tomé                        | Sea level    | no-HZ               | ILMN                    | no-HZC                            |

|                  |             |                             |             |       |      |        |
|------------------|-------------|-----------------------------|-------------|-------|------|--------|
| <i>D. yakuba</i> | SN2         | City,<br>São Tomé           | -           | no-HZ | ABI  | HZC    |
| <i>D. yakuba</i> | BS3         | São<br>Nicolau,<br>São Tomé | 1,090       | HZ    | ILMN | no-HZC |
| <i>D. yakuba</i> | BS4         | Bom<br>Sucesso,<br>São Tomé | 1,090       | HZ    | ILMN | HZC    |
| <i>D. yakuba</i> | Field1      | Obo<br>Reserve,<br>São Tomé | 1,090-1,190 | HZ    | ILMN | HZC    |
| <i>D. yakuba</i> | Field2      | Obo<br>Reserve,<br>São Tomé | 1,090-1,190 | HZ    | ILMN | no-HZC |
| <i>D. yakuba</i> | Field3      | Obo<br>Reserve,<br>São Tomé | 1,090-1,190 | HZ    | ILMN | HZC    |
| <i>D. yakuba</i> | BOSSU1153.1 | Obo<br>Reserve,<br>São Tomé | 1,153       | HZ    | ILMN | no-HZC |
| <i>D. yakuba</i> | OBAT1200.5  | Obo<br>Reserve,<br>São Tomé | 1,200       | HZ    | ILMN | HZC    |
| <i>D. yakuba</i> | COST1235.2  | Obo<br>Reserve,<br>São Tomé | 1,235       | HZ    | ILMN | HZC    |
| <i>D. yakuba</i> | Rain1       | Obo<br>Reserve,<br>São Tomé | 1,191-1,390 | HZ    | ILMN | HZC    |
| <i>D. yakuba</i> | Rain2       | Obo<br>Reserve,<br>São Tomé | 1,191-1,390 | HZ    | ILMN | HZC    |
| <i>D. yakuba</i> | Rain3       | Obo<br>Reserve,<br>São Tomé | 1,191-1,390 | HZ    | ILMN | HZC    |
| <i>D. yakuba</i> | Rain4       | Obo<br>Reserve,<br>São Tomé | 1,191-1,390 | HZ    | ILMN | no-HZC |
| <i>D. yakuba</i> | Rain5       | Obo<br>Reserve,<br>São Tomé | 1,191-1,390 | HZ    | ILMN | HZC    |
| <i>D. yakuba</i> | Rain6       | Obo<br>Reserve,             | 1,191-1,390 | HZ    | ILMN | HZC    |

|                    |             |                                         |             |       |      |        |
|--------------------|-------------|-----------------------------------------|-------------|-------|------|--------|
| <i>D. santomea</i> | BS11        | São Tomé<br>Bom<br>Sucesso,<br>São Tomé | 1,090       | HZ    | ILMN | HZC    |
| <i>D. santomea</i> | BS13        | Bom<br>Sucesso,<br>São Tomé             | 1,090       | HZ    | ILMN | no-HZC |
| <i>D. santomea</i> | Field4      | Obo<br>Reserve,<br>São Tomé             | 1,090-1,190 | HZ    | ILMN | no-HZC |
| <i>D. santomea</i> | Field6      | Obo<br>Reserve,<br>São Tomé             | 1,090-1,190 | HZ    | ILMN | no-HZC |
| <i>D. santomea</i> | COST1235.1  | Obo<br>Reserve,<br>São Tomé             | 1,235       | HZ    | ILMN | HZC    |
| <i>D. santomea</i> | STO.4       | Obo<br>Reserve,<br>São Tomé             | 1,150-1,350 | HZ    | ILMN | HZC    |
| <i>D. santomea</i> | STO.7       | Obo<br>Reserve,<br>São Tomé             | 1,150-1,350 | HZ    | ILMN | HZC    |
| <i>D. santomea</i> | STO.18      | Obo<br>Reserve,<br>São Tomé             | 1,150-1,350 | HZ    | ILMN | HZC    |
| <i>D. santomea</i> | Rain36      | Obo<br>Reserve,<br>São Tomé             | 1,191-1,390 | HZ    | ILMN | HZC    |
| <i>D. santomea</i> | Rain40      | Obo<br>Reserve,<br>São Tomé             | 1,191-1,390 | HZ    | ILMN | no-HZC |
| <i>D. santomea</i> | Thena2      | Obo<br>Reserve,<br>São Tomé             | 1,391-1,415 | HZ    | ILMN | no-HZC |
| <i>D. santomea</i> | Thena5      | Obo<br>Reserve,<br>São Tomé             | 1,391-1,415 | HZ    | ILMN | no-HZC |
| <i>D. santomea</i> | CAR1600.3   | Pico<br>Calvario,<br>São Tomé           | 1,600       | no-HZ | ILMN | HZC    |
| <i>D. santomea</i> | QUIJA650.1  | Rio Queijo,<br>São Tomé                 | 650         | no-HZ | ILMN | no-HZC |
| <i>D. santomea</i> | QUIJA650.12 | Rio Queijo,<br>São Tomé                 | 650         | no-HZ | ILMN | no-HZC |

|                    |             |                              |       |       |      |        |
|--------------------|-------------|------------------------------|-------|-------|------|--------|
| <i>D. santomea</i> | QUIJA650.24 | Rio Queijo,<br>São Tomé      | 650   | no-HZ | ILMN | no-HZC |
| <i>D. santomea</i> | Cabumbé     | Pico<br>Cabumbé,<br>São Tomé | 1,050 | no-HZ | ILMN | HZC    |

---

<sup>a</sup> HZ, line derived from a female collected in the classic hybrid zone formed by *D. yakuba* and

*D. santomea*; no-HZ, line derived from a female collected outside the classic hybrid zone

formed by *D. yakuba* and *D. santomea*

<sup>b</sup> ABI, Standard cycle sequencing run in an ABI 3730 Genome Analyzer; ILMN, Illumina  
GAII sequencing.

<sup>c</sup> HZC, hybrid zone clade; no-HZC, outside the hybrid zone clade.
